# Supplementary material
Source: ML conference proceedings conference paper supplement (https://proceedings.neurips.cc/paper_files/paper/2019/hash/8065d07da4a77621450aa84fee5656d9-Abstract.html)
Supplement: Supplementary file [file 8065d07da4a77621450aa84fee5656d9-Supplemental.zip]

## A Algorithm Proof

In this section, we present the detailed proofs for the formula in Algorithm 1. Note that the symbols follow the definition in the main paper.

**Proof 1** Given one vertex as  $i$ , the Eq. 8 proves the backward process of  $\frac{\partial \text{loss}}{\partial \mathbf{x}}$  in Algorithm 1.

$$\begin{aligned}\frac{\partial \text{loss}}{\partial \mathbf{x}_i} &= \frac{\partial f(\mathbf{x}_i)}{\partial \mathbf{x}_i} \sum_{j \in \Omega} \frac{\partial \text{loss}}{\partial \mathbf{y}_j} \frac{\partial \mathbf{y}_j}{\partial \mathbf{x}_i} \\ &= \frac{\partial f(\mathbf{x}_i)}{\partial \mathbf{x}_i} \sum_{j \in \Omega} S(\mathbf{E}_{i,j}) \left( \frac{\partial \text{loss}}{\partial \mathbf{y}_j} \frac{1}{z_j} \right) \\ &= \frac{\partial f(\mathbf{x}_i)}{\partial \mathbf{x}_i} \psi_i\end{aligned}\tag{8}$$

**Proof 2** Given one edge with a pair of connected vertices  $i$  and  $j$ , the Eq. 9-11 proves the backward process of  $\frac{\partial \text{loss}}{\partial \boldsymbol{\omega}}$  in Algorithm 1, where  $\Omega_i$  indicates the set of children of vertex  $i$  in the tree whose root is  $j$  and  $\Omega_j$  indicates the set of children of vertex  $j$  in the tree whose root is  $i$ .

$$\begin{aligned}\frac{\partial \text{loss}}{\partial \boldsymbol{\omega}_{i,j}} &= \frac{\partial S(\mathbf{E}_{i,j})}{\partial \boldsymbol{\omega}_{i,j}} \sum_{m \in \Omega} \frac{\partial \text{loss}}{\partial \mathbf{y}_m} \frac{\partial \mathbf{y}_m}{\partial S(\mathbf{E}_{i,j})} \\ &= \frac{\partial S(\mathbf{E}_{i,j})}{\partial \boldsymbol{\omega}_{i,j}} \sum_{m \in \Omega} \left( \frac{1}{z_m} \frac{\partial \text{loss}}{\partial \mathbf{y}_m} \frac{\partial z_m \mathbf{y}_m}{\partial S(\mathbf{E}_{i,j})} - \sum_{m \in \Omega} \frac{\partial \text{loss}}{\partial \mathbf{y}_m} \frac{\mathbf{y}_m}{z_m} \frac{\partial z_m}{\partial S(\mathbf{E}_{i,j})} \right) \\ &= \frac{\partial S(\mathbf{E}_{i,j})}{\partial \boldsymbol{\omega}_{i,j}} \sum (\gamma_i^s - \gamma_i^z)\end{aligned}\tag{9}$$

The computational complexity of the component  $\gamma_i^s$  can be reduce to linear by the dynamic programming procedure below.

$$\begin{aligned}\gamma_i^s &= \sum_{m \in \Omega} \frac{\partial \text{loss}}{\partial \mathbf{y}_m} \frac{1}{z_m} \frac{\partial z_m \mathbf{y}_m}{\partial S(\mathbf{E}_{i,j})} \\ &= \sum_{m \in \Omega} \left( \frac{\phi}{z} \right)_m \sum_{k \in \Omega} \frac{\partial S(\mathbf{E}_{m,k}) f(\mathbf{x}_k)}{\partial S(\mathbf{E}_{i,j})} \\ &= \sum_{m \in \Omega_i} \left( \frac{\phi}{z} \right)_m \sum_{k \in \Omega_j} S(\mathbf{E}_{m,i}) S(\mathbf{E}_{i,k}) f(\mathbf{x}_k) + \sum_{m \in \Omega_j} \left( \frac{\phi}{z} \right)_m \sum_{k \in \Omega_i} S(\mathbf{E}_{m,j}) S(\mathbf{E}_{j,k}) f(\mathbf{x}_k) \\ &= \sum_{m \in \Omega_i} S(\mathbf{E}_{m,i}) \left( \frac{\phi}{z} \right)_m \sum_{k \in \Omega_j} S(\mathbf{E}_{i,k}) f(\mathbf{x}_k) + \sum_{m \in \Omega_j} S(\mathbf{E}_{m,j}) \left( \frac{\phi}{z} \right)_m \sum_{k \in \Omega_i} S(\mathbf{E}_{j,k}) f(\mathbf{x}_k) \\ &= \hat{\psi}_i \cdot \hat{\rho}_j + \hat{\psi}_j \cdot \hat{\rho}_i \\ &= \hat{\psi}_i \cdot (\rho_i - S(\mathbf{E}_{i,j}) \hat{\rho}_i) + \hat{\rho}_i \cdot (\psi_i - S(\mathbf{E}_{j,i}) \hat{\psi}_i) \\ &= \hat{\psi}_i \cdot \rho_i + \psi_i \cdot \hat{\rho}_i - 2S(\mathbf{E}_{i,j}) \hat{\psi}_i \cdot \hat{\rho}_i\end{aligned}\tag{10}$$

The same procedure can be easily adapted to obtain the component  $\gamma_i^z$ .

$$\gamma_i^z = \sum_{m \in \Omega} \frac{\partial \text{loss}}{\partial \mathbf{y}_m} \frac{\mathbf{y}_m}{z_m} \frac{\partial z_m}{\partial S(\mathbf{E}_{i,j})} = \hat{\nu}_i z_i + \nu_i \hat{z}_i - 2S(\mathbf{E}_{i,j}) \hat{\nu}_i \hat{z}_i\tag{11}$$
